# Supplementary material for: Strongly fluorescent hydrogels with quantum dots embedded in cellulose matrices
Source: Royal Society of Chemistry journal article supplement (doi:10.1039/b908835k), 2009-01-01
Supplement: b908835k.pdf [file b908835k.pdf]

## Supporting Information

# Strongly Fluorescent Hydrogels with Quantum Dots Imbedded in Cellulose Matrix

Chunyu Chang, Jun Peng, Lina Zhang\* and Dai-Wen Pang

*Department of Chemistry, Wuhan University, Wuhan 430072, China*

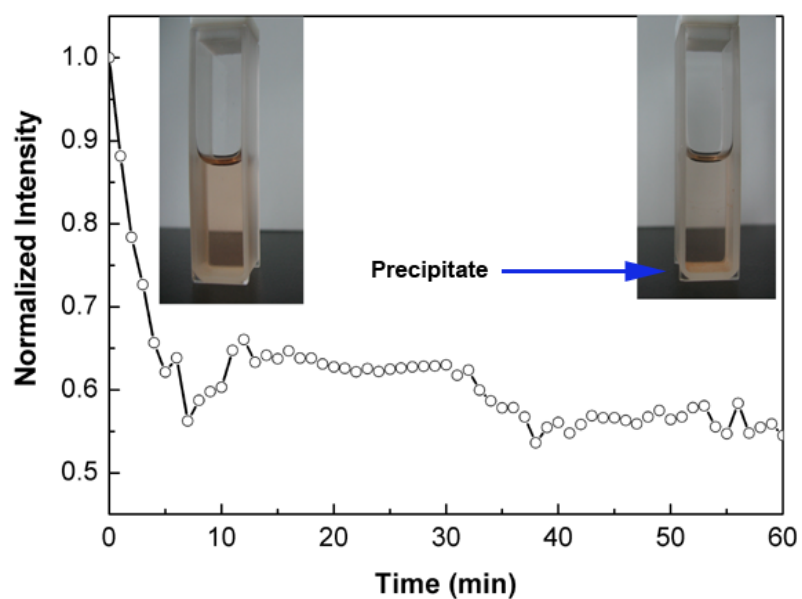

**Figure S1.** PL intensity of QDs as a function of the heating time in NaOH/urea aqueous solution at 60 °C. The photographs of the QDs solution are also present at 0 min and 60 min.

\* To whom correspondence should be addressed. Phone: +86-27-87219274.

Fax: +86-27-68754067. E-mail: [lnzhang@public.wh.hb.cn](mailto:lnzhang@public.wh.hb.cn) (L. Zhang).

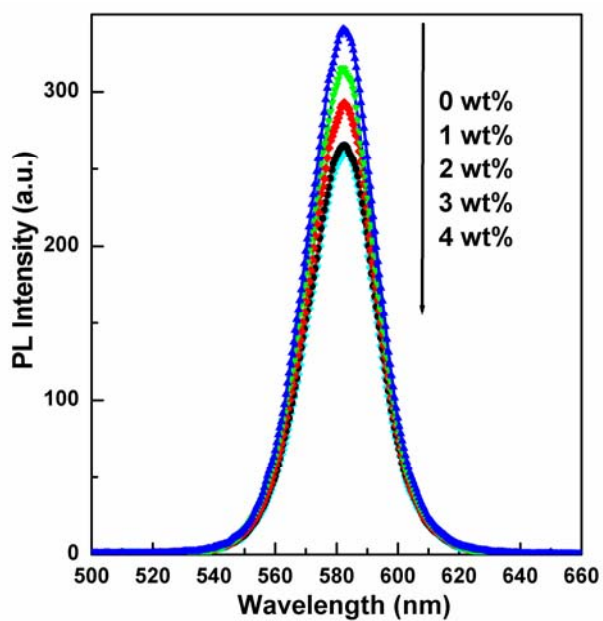

**Figure S2.** PL spectra of QDs (3.2 nm) in NaOH/urea aqueous solution with different urea concentration.

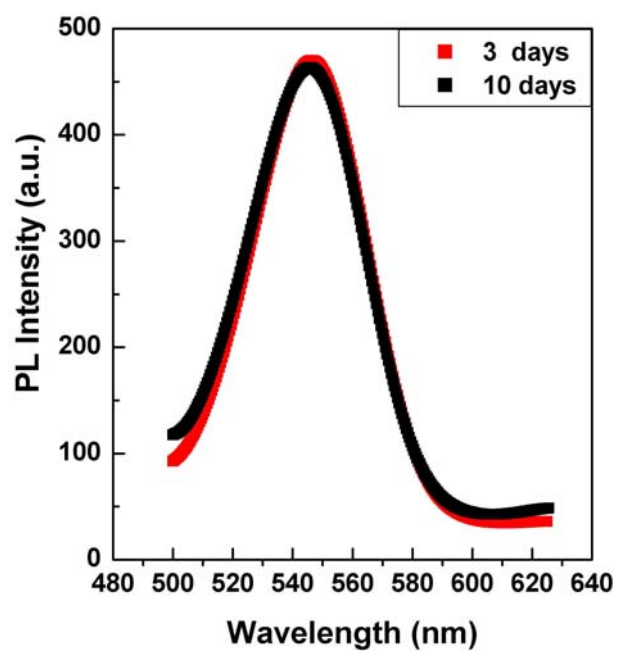

**Figure S3.** PL spectra of cellulose-QDs (2.8 nm) hybrid hydrogel with different dialysis time.

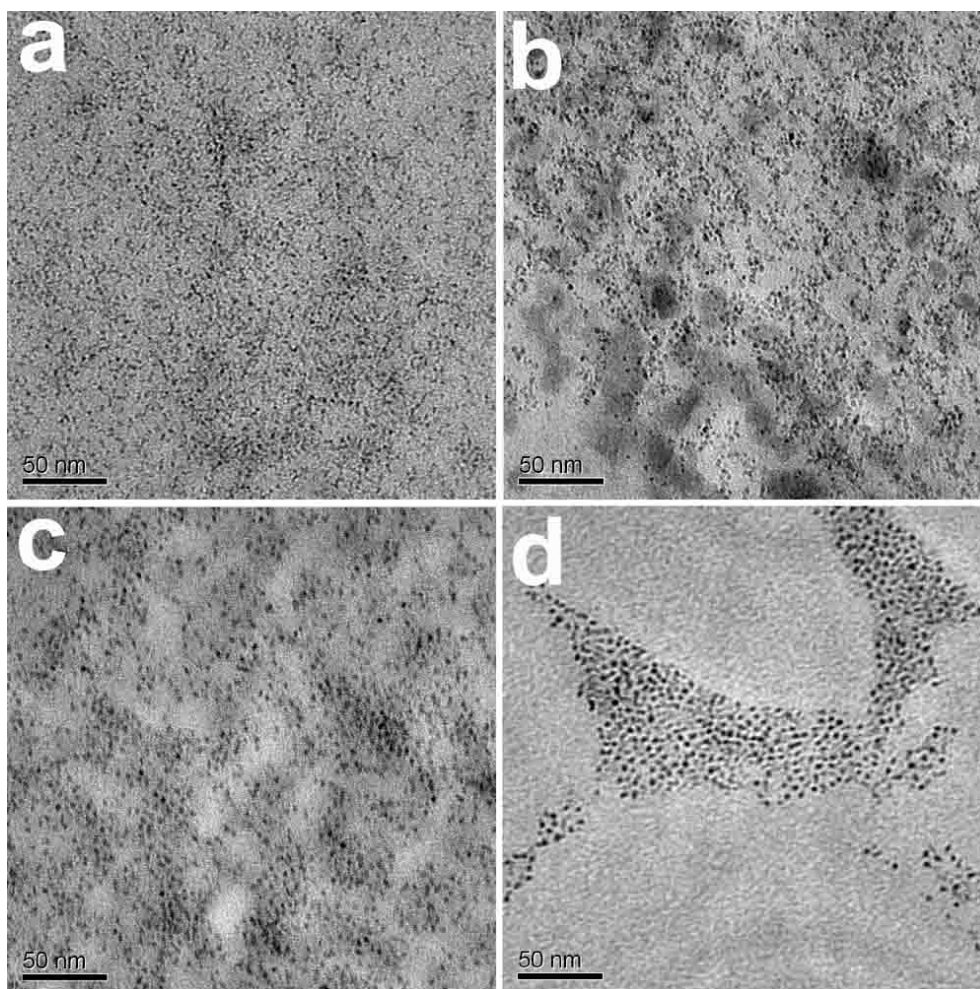

**Figure S4.** TEM images of CdSe/ZnS quantum dots with different sizes: 2.8 nm (a), 3.0 nm (b), 3.2 nm (c) and 3.6 nm (d).
